# Supplementary material
Source: PubMed Central journal article supplement (PMC7228809)
Supplement: EMS86410-supplement-Suppl_Fig_1_5_and_Suppl_Table_1_3.pdf [file EMS86410-supplement-Suppl_Fig_1_5_and_Suppl_Table_1_3.pdf]

## SUPPLEMENTAL

**Supplemental Figure 1: Glucagon-Venus coexpression in control islets-** Illustrative images corresponding to pancreatic sections of CTRL mice were performed using anti-Venus (green, panel C) and anti-glucagon (red, panel B) immunostaining as well as DAPI staining. Merge images represent DAPI, Venus and Glucagon signals (A). White arrows indicate Glucagon positive/Venus negative cells.

Proportion of Glucagon-positive cells which expressed Venus as well as proportion of Venus-positive cells which express Glucagon was evaluated by manual counting from 5 different islets of 3 different male control mice (D). Immunofluorescence from pancreatic sections of CTRL mice were also performed using anti-Venus (green) and anti-insulin (red) as well as DAPI staining (E) to confirm that no Venus+ cells express insulin.

**Supplemental Figure 2-4: Facs-profile of CTRL, STZ and STZ+Insulin implant mice-** Images represent illustrative FACS-sorting profiles from Venus mice for CTRL (Fig.2), STZ (Fig.3) and STZ+Insulin implant (Fig.4) groups. Facs-sorting settings include usual parameters such as SSC and FSC Area (panel A) of living cells (panel B), fluorescence detection (panel E) and doublet exclusion (panel C and D). Collected Venus-positive  $\alpha$  cells thus represent single living fluorescent cells (panel G). Pancreatic  $\beta$  cells were also gated without sorting just to monitor efficiency of the protocol (STZ-induced insulin-producing cell ablation, panel F and H). We collected an average of 13641 +/-1354 Venus+  $\alpha$  cells per mouse for CTRL, 5742 +/-549 and 5315 +/-806 for STZ and STZ+Insulin implant groups respectively.

**Supplemental Figure 5: Molecular characterization of FACS-sorted Venus+ alpha cells-** After islet isolation, pancreatic endocrine cell dissociation and FACS-sorting (BioRad-S3), specific mRNA levels were evaluated from amplified cDNA (obtained from 10ng of total RNA) of 6 Venus Transgenic mice (Male and Female). The measurement of different mRNA levels of target genes were performed by real-time PCR (Light-cycler LC480) and obtained from Venus+  $\alpha$  cell fraction (A) and  $\beta$  cell fraction

(B). Data are expressed relative to Rps9, beta-actin and Tubulin Beta mRNA values using Roche software. Venus- and beta-cell fractions were collected after islets dissociation using typical FACS profile (C). Data were also expressed by specific ratios between glucagon and insulin 1 and 2 mRNA levels as well as Pcsk2 compared to Pcsk1 (D) to specify the high purity of Venus sorted  $\alpha$  cells. Contamination of Venus+  $\alpha$  cell fraction by pancreatic  $\beta$  cells is estimated under 1%.

**Supplemental Table 1-3:** The table indicates the sequence of the different oligonucleotides used for real-time PCR experiments. Each target gene was designed in our laboratory and evaluated for specificity and amplification efficiency. Real-time PCR were performed for each gene in mouse primary Venus+  $\alpha$  cells using Light-cycler 480 SYBR Green I Master Mix and Light-Cycler 480 (Roche Diagnostics). For quantification, a standard curve was systematically generated with four different amounts of total amplified cDNA. Each assay was performed in duplicate and validation of the real time PCR runs was assessed by evaluation of the melting temperature of the products and by the slope and error obtained with the standard curve (slope between -3.1 and -3.3). The analyses were performed using the Light-Cycler software (Roche Diagnostics). PCR products were also analyzed on ethidium bromide-stained 3 % agarose gels for qualitative aspects (single PCR product and correct size) and sequenced for final validation.

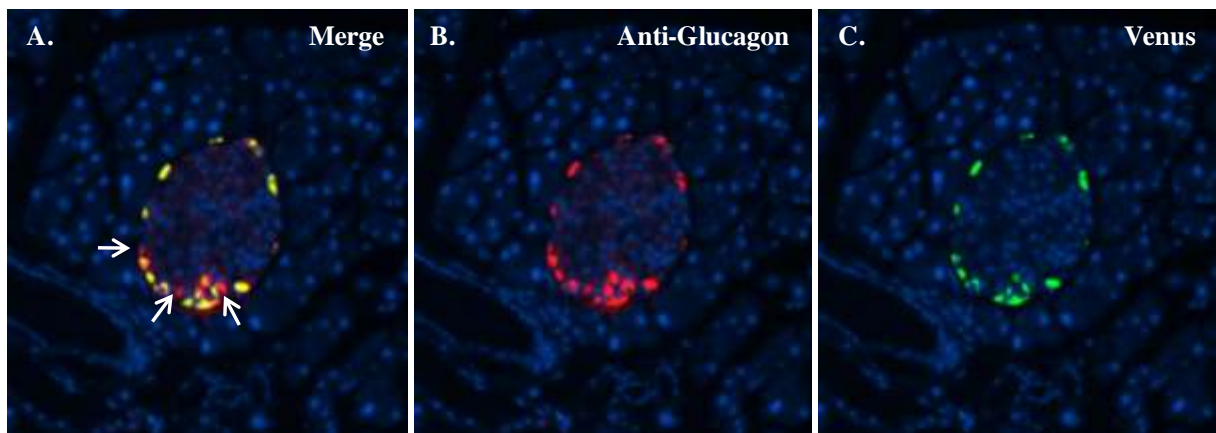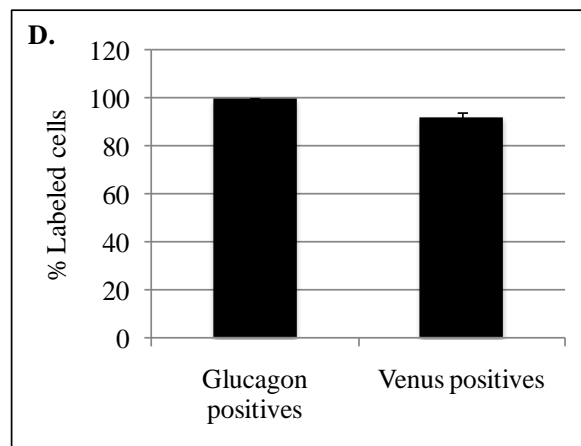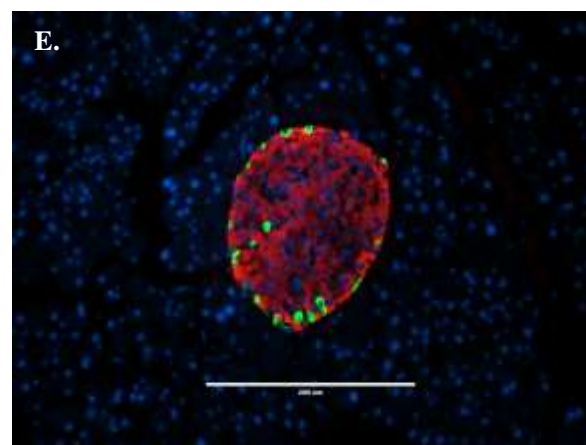

Supplemental Figure 1: Glucagon-Venus coexpression in control islets

**CTRL group**

**A.**

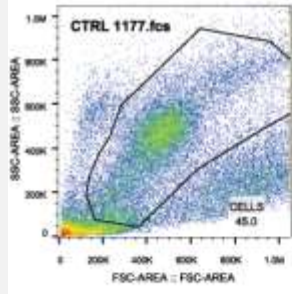

**B.**

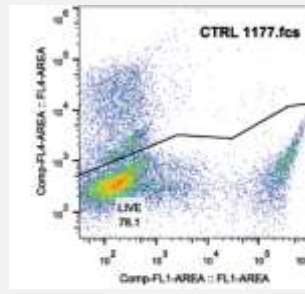

**C.**

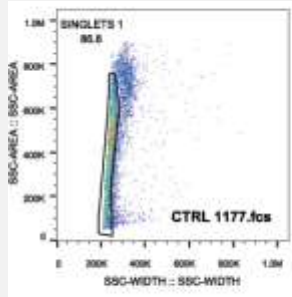

**D.**

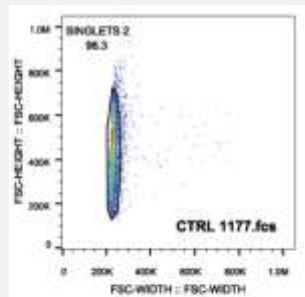

**E.**

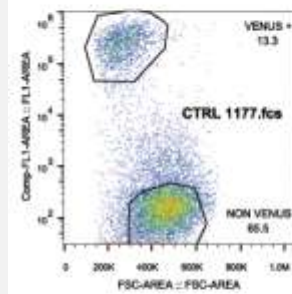

**F.**

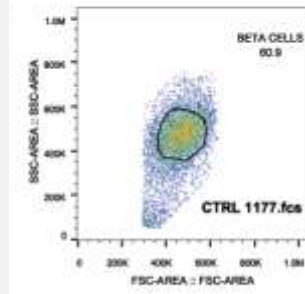

**G.**

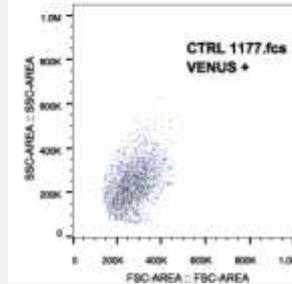

**H.**

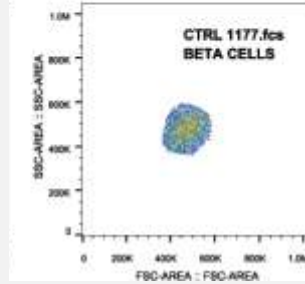

**Supplemental Figure 2: CTRL islets Facs Profile**

STZ group

A.

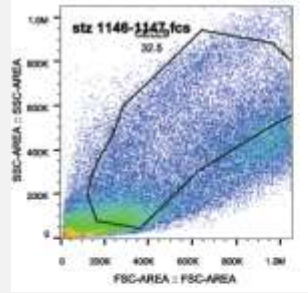

B.

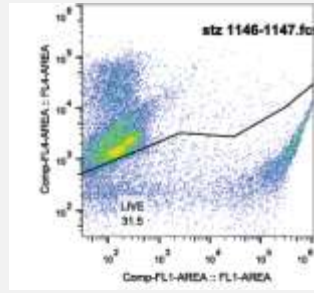

C.

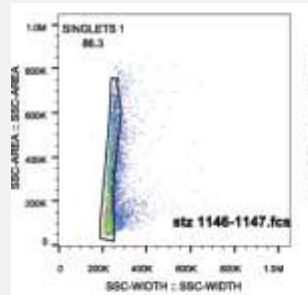

D.

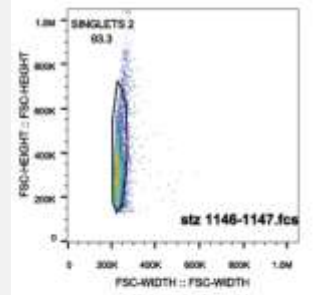

E.

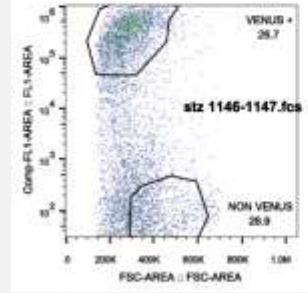

F.

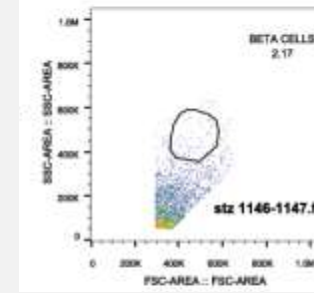

G.

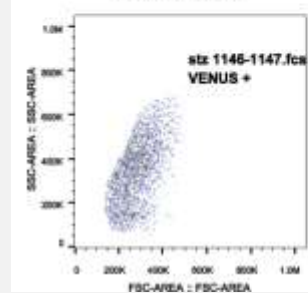

H.

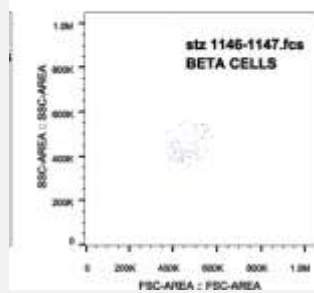

Supplemental Figure 3: STZ islets Facs Profile

**STZ+Insulin implant group**

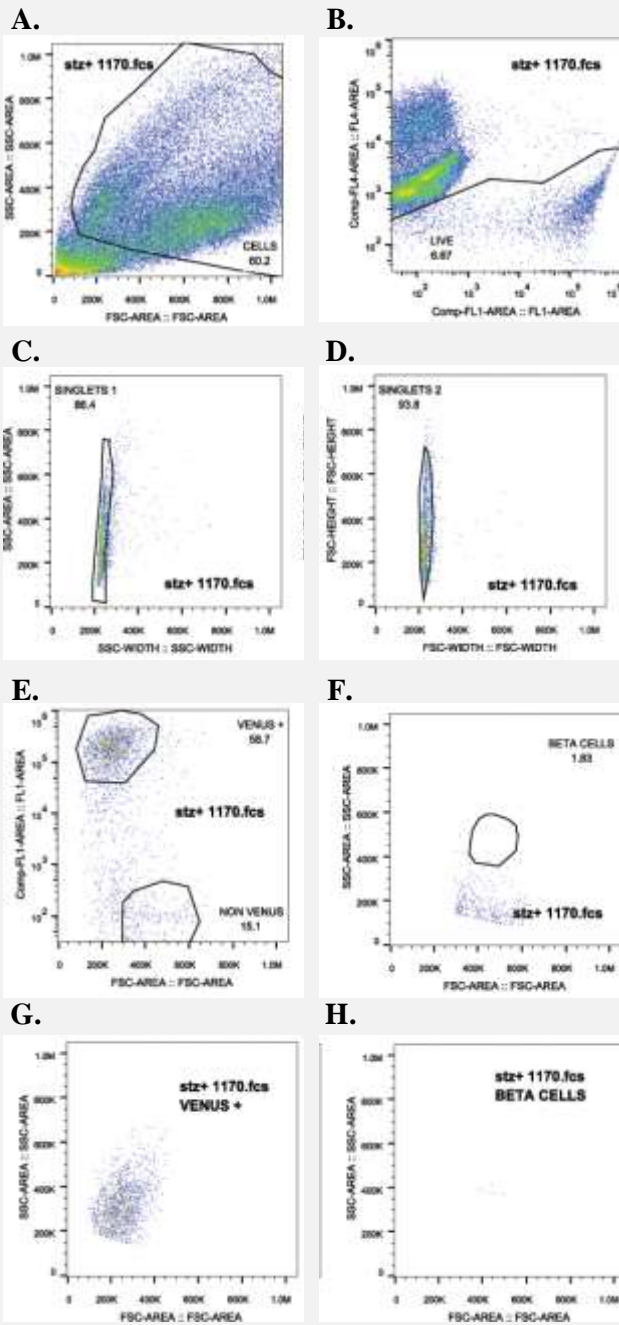

**Supplemental Figure 4: STZ+ Insulin Implant islets Facs Profile**

**A. Venus + cell fraction**

| Ratio between gene targets and references | Glucagon | Insulin 1 | Insulin 2 | Pcsk1/3 | Pcsk2 |
|-------------------------------------------|----------|-----------|-----------|---------|-------|
| Mean                                      | 3762000  | 1280.1    | 1781.7    | 16.61   | 38460 |
| SEM                                       | 523998   | 547.2     | 869.6     | 4.69    | 7738  |

**B. Beta cell fraction**

| Ratio between gene targets and references | Glucagon | Insulin 1 | Insulin 2 | Pcsk1/3 | Pcsk2 |
|-------------------------------------------|----------|-----------|-----------|---------|-------|
| Mean                                      | 132.7    | 1184000   | 1723333   | 3482.3  | 12815 |
| SEM                                       | 67.5     | 45011     | 35276     | 263.6   | 1224  |

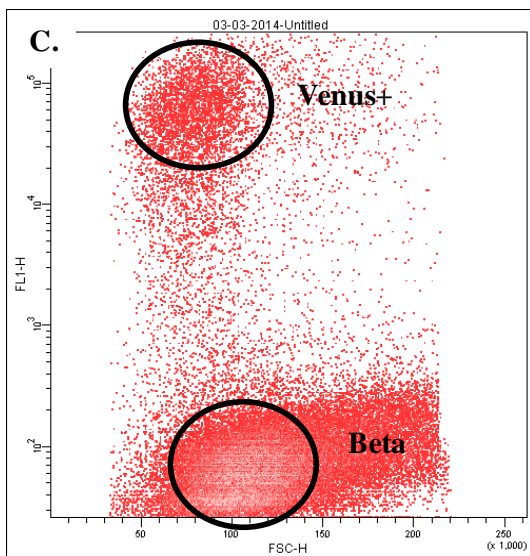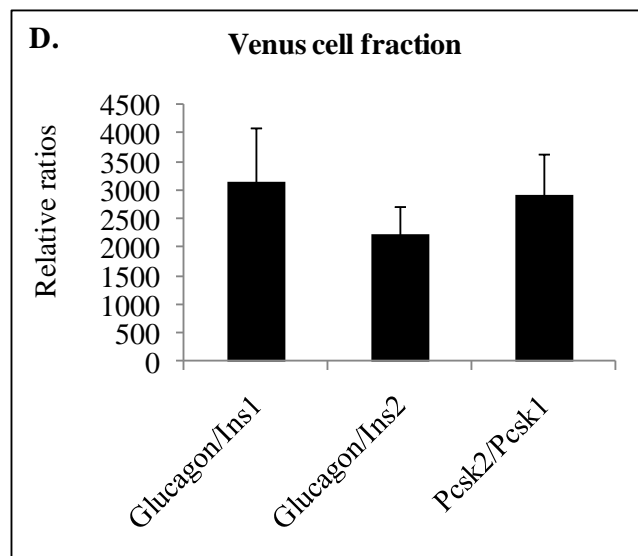

**Supplemental Figure 5: Molecular characterization of FACS-sorted Venus+ alpha cells**

| Name               | sequence 5'-3'                                        |
|--------------------|-------------------------------------------------------|
| Glucagon S/AS      | gatcattcccagcttcccag and ctggtaaaggtcccttcagc         |
| PC2 S/AS           | gaattgactatctccaccagacc and agtcatctgtgtatcgagggtatgg |
| Brain4 S/AS        | ttcctcaagtgtcccaagcc and gcttctccagtcagagatc          |
| Pax6 S/AS          | ttaccaagagcagattgagg and caggtagatctattttgct          |
| MafB S/AS          | accaaggacgaggtgatcc and caggtgatgtttctgctgga          |
| cMaf S/AS          | atggcttcagaactggcaat and ccggttccttttctactca          |
| Foxa1 S/AS         | catgagagcaacgactggaa and ttggcgtaggacatggtgaa         |
| Foxa2 S/AS         | cagctactacgaggagcc and gtcattccagcggcccac             |
| Foxa3 S/AS         | tgctgggctcagtgaagatg and catgtaggagttgagagggg         |
| HNF1 $\alpha$ S/AS | atcccagcagatcctgttcc and cagttgtagacacgcacctc         |
| HNF4 $\alpha$ S/AS | tatgaaggagcagctgctgg and tcattgcctaggagcagcac         |
| TCF7L2 S/AS        | tcaatgaatcagagacgaatcaaac and ttggccgcttcttccaaac     |
| NeuroD1 S/AS       | tccagggttatgagatgctac and gttcctcgtctgagaactgag       |
| Nkx2.2 S/AS        | agcaccgagggcctccaata and gccctgggtctccttgcac          |
| Isl1 S/AS          | tgagggtttctccgatttg and gcatcacgaagtcgttcttg          |
| PC1 S/AS           | gggctgaacaacagtatgaaaag and catgaaggtccagcttgggc      |

**Supplemental Table 1**

| Name        | sequence 5'-3'                                       |
|-------------|------------------------------------------------------|
| GCK S/AS    | catccccgaggacccatgac and ggagaaggtgaagcccagggg       |
| Glut1 S/AS  | gtgtcgtgtttgtgtagag and caaagccaaagatggccacga        |
| Sgl1 S/AS   | tggtgtacggatcaggtcattg and ttcagatagccacacaggggtacag |
| Sgl2 S/AS   | gctggatttgagtggatgc and cggtcagatacactggcaca         |
| IR S/AS     | ggagagaccttgaaattggg and ttggtcttcagggcaatgctg       |
| IRS1 S/AS   | cgctccagtgaggatttaagc and gagtctgggtacccatgagtt      |
| IRS2 S/AS   | tctccaaagtggcctacaac and atcatctgccccaggttac         |
| PIk3cd S/AS | gcagtgcaccttcatggactc and gtccatgagctggatcatctgc     |
| PIk3r1 S/AS | gagcagcaaccgaaacaaagc and atagccggtggcagcttctgtt     |
| MapK8 S/AS  | cacaccacagaatcctagaag and gaagtgcttgattccacacag      |
| MapK14 S/AS | gattctggattttgggctggc and aacagctcagccatgatgcag      |
| Ptpn1 S/AS  | ctgatggacaagaggaaagacc and agctccttccactgatcctgc     |
| Pten S/AS   | tcttccaaaacagaacaagatgc and tttctgaggtttcctctgtctc   |

**Supplemental Table 2**



| Name              | sequence 5'-3'                                       |
|-------------------|------------------------------------------------------|
| GipR S/AS         | gtgtcttgcccctggtatct and tctctccaagatccccactg        |
| IL6R S/AS         | cactgtgcgttgcaaacagtg and ccttccaggtatggctgatacc     |
| Gp130 S/AS        | gaagccatagtcgtgcctgtg and ggtgaccactgggcaatatgac     |
| GPR40 S/AS        | tgagccacaaacggaagctc and gttgagcaccacactccagg        |
| GPR119 S/AS       | ccactcggagtctccatattcc and accttgggtgaaacacagcaa     |
| GPR120 S/AS       | gggaccaggaattccgatt and tcatgggatgtgtttttgtgac       |
| Kir6.2 S/AS       | gtgtccaagaaaggcaactg and gcacaggaaggacatggtg         |
| Sur1 S/AS         | aatgaccagcctcagggcc and cagcaggaacagcggtgtg          |
| Cav1.2 S/AS       | cctttccggaagacgactc and gaagagaagtccgtaggcaat        |
| Cav2.1 S/AS       | tcaagtgaagacaacgtggtga and gccaggacgatgcagttag       |
| Cav2.2 S/AS       | atcgccaactgcattgttct and agcaaaagatcccgatgaagt       |
| Cav2.3 S/AS       | ccaatgcatcactatggaagg and cgatgatgatgagagggatga      |
| Nav1.3 S/AS       | ggagacaggtttccaagtgc and aacagggagccacggatactc       |
| Nav1.7 S/AS       | tctagattgaaggaatgaggg and actcatagaactgccagcaaa      |
| Stx1A S/AS        | gaaaacgtggaggaggtgaa and ttcgctgtcttcttaatgtcc       |
| Snap25 S/AS       | atcagcggacagcatcctc and gtcttcggccatggtactg          |
| Sumo1 S/AS        | gacgtagaggaagtccctgcagcc and tttgcctcctggtcagacatggt |
| Sumo2 S/AS        | gcggaccgggtgectctttt and tgctcattgacaaacctgcc        |
| Sumo3 S/AS        | gggagcgtccccacacccaa and atgctctcgtccccgcagtgt       |
| Rps9 S/AS         | ctccggaacaaacgtgaggt and tccagcttcatcttgcctc         |
| HPRT S/AS         | gattttatcagactgaagagc and tccagttaaagttgagagatc      |
| Actin Beta S/AS   | ctaaggccaacctgaaaagat and cacagcctggatggctacgt       |
| Tubulin Beta S/AS | gcagtgcggcaaccagat and agtgggatcaatgcatgct           |
| Cyclophilin S/AS  | acacgccataatggcaactgg and ttgccattctggacceaaa        |

**Supplemental Table 3**
